# Supplementary material for: TRPM8 voltage sensor mutants reveal a mechanism for integrating thermal and chemical stimuli
Source: Springer Nature journal article supplement (doi:10.1038/nchembio862), 2007-02-11
Supplement: nchembio862-S3.pdf [file nchembio862-S3.pdf]

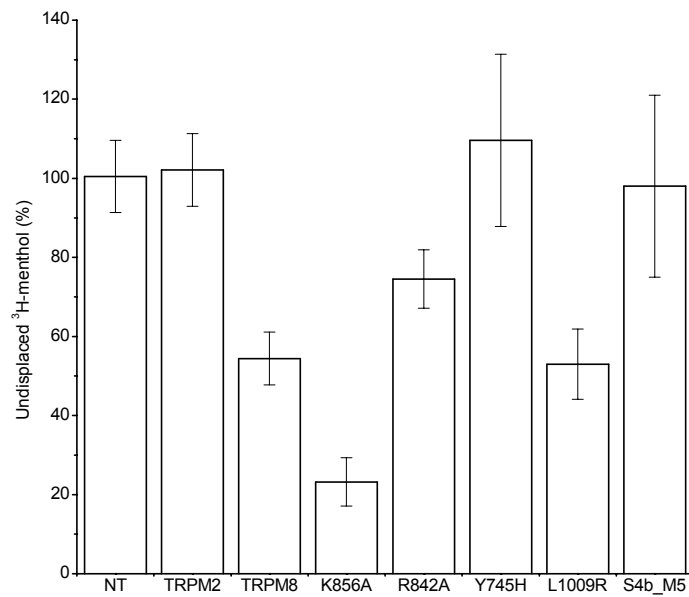

**Supplementary Figure 3.** <sup>3</sup>H-menthol displacement assay. Shown is the percentage of bound <sup>3</sup>H-menthol that is not displaced upon addition of 100  $\mu$ M menthol (n = 6-23). Plasma membrane enriched fractions from non-transfected HEK293 cells or HEK293 cells transfected with TRPM2, WT TRPM8 or mutant TRPM8 were incubated with 25 nM <sup>3</sup>H-menthol in the absence or presence of 100  $\mu$ M or 5 mM non-radioactive menthol. The counts in the presence of 5 mM menthol were considered as non-specific and used to subtract background <sup>3</sup>H-menthol binding.
